# Supplementary material for: Identification and Characterization of a Rare Fungus, Quambalaria cyanescens, Isolated from the Peritoneal Fluid of a Patient after Nocturnal Intermittent Peritoneal Dialysis
Source: PLOS journal article supplement (doi:10.1371/journal.pone.0145932), 2015-12-30
Supplement: S1 (10.1371/journal.pone.0145932.s001) [file journal.pone.0145932.s001]

**CONSENT BY PATIENT FOR OPERATION/  
TREATMENT/PROCEDURE**

**UNIVERSITY MALAYA MEDICAL CENTRE**

I \_\_\_\_\_, Identification Number \_\_\_\_\_  
(Name of Patient)

of \_\_\_\_\_  
(Address)

hereby consent to the \* operation/treatment/procedure of Case report to journal

the nature, purpose, effects and risks which have been explained to me by Dr. Lim Soo Kun  
(Name of Attending Doctor)

through the interpretation of \_\_\_\_\_ in Mandarin  
(Name of Interpreter)  
language / dialect.

The doctor has explained the following (Tick whichever applies)

- ☐ The nature of the operation/treatment/procedure.
- ☐ Sedation need to be given.
- ☐ The reason for the operation/treatment/procedure.
- ☐ The level of expertise used during the operation/treatment/procedure.
- ☐ The benefits of the operation/treatment/procedure.
- ☐ The general and specific risks of the operation/treatment/procedure.
- ☐ The alternatives to the operation/treatment/procedure.
- ☐ The line of action in the event of a complication arising following the operation/treatment/procedure.
- ☒ The patient's freedom of choice.
- ☒ The patient's freedom to ask questions.
- ☐ The patient's freedom to withdraw consent at any time before the procedure is performed.

Additional information discussed between doctor and patient (or as attached).

Patient was informed and explained that his peritonitis case will be  
reported to a peer-reviewed journal. Patient understood & was  
agreeing

Signature: [Signature] (Patient)

Date: 26-12-2015

Signature: [Signature] (Attending Doctor)

Stamp: A/PROF DR LIM SOO KUN  
MMC Full Reg. no. 36871  
Consultant Nephrologist & Physician  
Department of Medicine  
UMMC

Date: \_\_\_\_\_

Signature: [Signature] (Witness)

Rohana Hidayat (Name)

Date: 26/12/2015

\* Strike out where not applicable

**CONSENT BY PATIENT FOR OPERATION/  
TREATMENT/PROCEDURE**

BK-MIS-118-E02

32210880 L 28/02/1978  
WONG TECK SENG

780228145231

Wad/Klk :

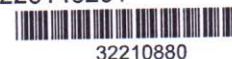

32210880

8TE
